# Supplementary material for: Therapist-Guided Telerehabilitation for Adult Cochlear Implant Users: Developmental and Feasibility Study
Source: PubMed Central journal article supplement (PMC7290457; doi:10.2196/15843), 2020-05-28
Supplement: rehab_v7i1e15843_app1.pdf [file rehab_v7i1e15843_app1.pdf]

Overview of German computer-based auditory training programs available for cochlear implant users.

|                                | Hörtraining online Sensoton | Online Hörtraining Verheyen | Asklepios (HCIZ) | Listen Up! (MED-EL) | Sound Success (Advanced Bionics) | OLCIT (Jade University) | Hörtraining DHZ (DHZ) | Schallquelle (Biedermann Gbr) |
|--------------------------------|-----------------------------|-----------------------------|------------------|---------------------|----------------------------------|-------------------------|-----------------------|-------------------------------|
| Synthetic approach             | Y <sup>a</sup>              | Y                           | Y                | Y                   | Y                                | Y                       | Y                     | Y                             |
| Analytic approach              | Y                           | N <sup>b</sup>              | Y                | Y                   | N                                | N                       | Y                     | Y                             |
| Structured program             | Y                           | Y                           | N                | N                   | N                                | N                       | N                     | N                             |
| Initial analysis               | n.s. <sup>c</sup>           | N                           | N                | (Y) <sup>d</sup>    | N                                | N                       | N                     | N                             |
| Adaptive features              | N                           | N                           | N                | N                   | N                                | N                       | N                     | N                             |
| Therapist guided               | N                           | N                           | N                | N                   | N                                | N                       | N                     | N                             |
| Simple statistical evaluation  | Y                           | N                           | Y                | Y                   | Y                                | N                       | Y                     | Y                             |
| Complex statistical evaluation | n.s.                        | N                           | N                | N                   | N                                | N                       | N                     | N                             |

<sup>a</sup>Y: included

<sup>b</sup>N: not included.

<sup>c</sup>n.s.: not specified.

<sup>d</sup>(Y): Listen up! contains an initial test, based on hearing status and without impact on training schedule.
