# Supplementary material for: Therapist-Guided Telerehabilitation for Adult Cochlear Implant Users: Developmental and Feasibility Study
Source: PubMed Central journal article supplement (PMC7290457; doi:10.2196/15843), 2020-05-28
Supplement: rehab_v7i1e15843_app2.pdf [file rehab_v7i1e15843_app2.pdf]

**Components of the initial analysis based on the International Classification of Functioning, Disability, and Health.**

| <b>Component</b>              | <b>Description</b>                                                                                                                                                                                                                                       |
|-------------------------------|----------------------------------------------------------------------------------------------------------------------------------------------------------------------------------------------------------------------------------------------------------|
| Cochlear implant user profile | Name, address, date of birth, sex, family status, professional activity                                                                                                                                                                                  |
| Cognition                     | Working memory, short- and long-term memory, processing speed, attention measured with a cognition test battery                                                                                                                                          |
| Hearing                       | Information on hearing loss in both ears, speech recognition measured with the Freiburger numeric and monosyllabic comprehension test, sentence recognition measured with the Oldenburger sentence comprehension test (Hörtech GmbH, Oldenburg, Germany) |
| Vision                        | Information on vision status                                                                                                                                                                                                                             |
| Motor function                | Information on motor functions                                                                                                                                                                                                                           |
| Activity and participation    | Communication skills, difficulties in conversations, speech comprehension ability on the phone, sound localization, activity restriction due to hearing loss                                                                                             |
| Environment                   | Noise environment in everyday life, support from a trusted person, acceptance of wearing/using a cochlear implant                                                                                                                                        |
| Therapeutic goals             | Subdivided into the following areas: speech comprehension, speech perception and identification, sound localization, and quality of life                                                                                                                 |
| Notes                         | Free text session                                                                                                                                                                                                                                        |
