# Supplementary material for: Therapist-Guided Telerehabilitation for Adult Cochlear Implant Users: Developmental and Feasibility Study
Source: PubMed Central journal article supplement (PMC7290457; doi:10.2196/15843), 2020-05-28
Supplement: rehab_v7i1e15843_app3.pdf [file rehab_v7i1e15843_app3.pdf]

## Bochumer questionnaire for cochlear implant users.

| Question                            |                                                                                         | Total respondents, n (%) | Yes, n (%) | No, n (%) |
|-------------------------------------|-----------------------------------------------------------------------------------------|--------------------------|------------|-----------|
| <b>Exercises (N=36)<sup>a</sup></b> |                                                                                         |                          |            |           |
|                                     | 1. Did you have difficulties finding the exercise?                                      | 36 (100)                 | 8 (22)     | 28 (78)   |
|                                     | 2. Was the exercise clear?                                                              | 35 (97)                  | 33 (94)    | 2 (6)     |
|                                     | 3. Did you find the “Audio Repeat” button?                                              | 35 (97)                  | 33 (94)    | 2 (6)     |
|                                     | 4. Did you feel supported by the “Audio Repeat” button?                                 | 36 (100)                 | 35 (97)    | 1 (3)     |
|                                     | 5. Was the function of each button clear to you?                                        | 36 (100)                 | 33 (92)    | 3 (8)     |
|                                     | 6. Did you miss supporting tools to be able to complete the exercise satisfactorily?    | 36 (100)                 | 3 (8)      | 33 (92)   |
|                                     | 7. Do you think there were enough options to answer?                                    | 35 (97)                  | 34 (97)    | 1 (3)     |
|                                     | 8. Did you find the images appealing?                                                   | 33 (92)                  | 32 (97)    | 1 (3)     |
|                                     | 9. Was every image clear/unambiguous to you?                                            | 33 (92)                  | 31 (94)    | 2 (6)     |
|                                     | 10. Did you have the feeling that the level of difficulty of the exercise was changing? | 34 (94)                  | 9 (26)     | 25 (74)   |
|                                     | 11. Was the visualization of the feedback comprehensible?                               | 35 (97)                  | 35 (100)   | 0 (0)     |
|                                     | 12. Would you need more detailed information about your mistakes to be able to improve? | 34 (94)                  | 7 (21)     | 27 (79)   |
| <b>Feedback (N=18)</b>              |                                                                                         |                          |            |           |
|                                     | 13. Was the feedback presented in a visually appealing way?                             | 18 (100)                 | 18 (100)   | 0 (0)     |
|                                     | 14. Was the feedback clear to you?                                                      | 18 (100)                 | 15 (83)    | 3 (17)    |
|                                     | 15. Does the feedback help you to judge your performance?                               | 18 (100)                 | 18 (100)   | 0 (0)     |
|                                     | 16. Does the feedback motivate you to keep on training?                                 | 18 (100)                 | 18 (100)   | 0 (0)     |
|                                     | 17. Was there sufficient feedback?                                                      | 18 (100)                 | 16 (89)    | 2 (11)    |
| <b>Statistical features (N=18)</b>  |                                                                                         |                          |            |           |
|                                     | 18. Did you like the design of the statistics page?                                     | 18 (100)                 | 17 (94)    | 1 (6)     |
|                                     | 19. Is the summarizing table clear?                                                     | 16 (89)                  | 14 (88)    | 2 (12)    |
|                                     | 20. Do the statistical data help you to assess your performance?                        | 18 (100)                 | 15 (83)    | 3 (17)    |
|                                     | 21. Do the statistical data motivate you to keep on training?                           | 18 (100)                 | 15 (83)    | 3 (17)    |

| <b>Overall assessment (N=18)</b> |                                                                                                                                                         |          |             |             |
|----------------------------------|---------------------------------------------------------------------------------------------------------------------------------------------------------|----------|-------------|-------------|
|                                  | 22. Was the program challenging?                                                                                                                        | 18 (100) | 12<br>(67)  | 6<br>(33)   |
|                                  | 23. Was the program varied?                                                                                                                             | 18 (100) | 18<br>(100) | 0<br>(0)    |
|                                  | 24. Did the program require you to make unnecessary mouse clicks?                                                                                       | 18 (100) | 0<br>(0)    | 18<br>(100) |
|                                  | 25. Does the program contain unclear terms, names, abbreviations, or symbols?                                                                           | 18 (100) | 1<br>(6)    | 17<br>(94)  |
|                                  | 26. Is every function/feature clear and understandable?                                                                                                 | 18 (100) | 16<br>(89)  | 2<br>(11)   |
|                                  | 27. Did the program meet your expectations?                                                                                                             | 16 (89)  | 13<br>(81)  | 3<br>(19)   |
|                                  | 28. Would you recommend the program to others?                                                                                                          | 18 (100) | 17<br>(94)  | 1<br>(6)    |
|                                  | 29. Would you like to continue to use the program in the future?                                                                                        | 16 (89)  | 14<br>(88)  | 2<br>(12)   |
| <b>Relevance (N=18)</b>          |                                                                                                                                                         |          |             |             |
|                                  | 30. Do you think the exercises are interesting for your daily life?                                                                                     | 18 (100) | 17<br>(94)  | 1<br>(6)    |
|                                  | 31. Do you think the exercises are relevant to you daily life?                                                                                          | 18 (100) | 15<br>(83)  | 3<br>(17)   |
|                                  | 32. Do the exercises differ from other computer based hearing training programs?                                                                        | 13 (72)  | 8 (62)      | 5<br>(38)   |
|                                  | 33. Do the exercises differ from the exercises that you perform during the face-to-face therapy (rehabilitation) in the clinic/cochlear implant center? | 17 (94)  | 9<br>(53)   | 8<br>(47)   |

<sup>a</sup>Most cochlear implant users evaluated the “exercises” twice and the other topics once.
