# Supplementary material for: Therapist-Guided Telerehabilitation for Adult Cochlear Implant Users: Developmental and Feasibility Study
Source: PubMed Central journal article supplement (PMC7290457; doi:10.2196/15843), 2020-05-28
Supplement: rehab_v7i1e15843_app4.pdf [file rehab_v7i1e15843_app4.pdf]

**System Usability Scale scores for cochlear implant users (N=18) and therapists (N=10).**

| Statement                                                                                            | Respondents, n (%)    | 0        | 1 | 2 | 3 | 4 | Total, n (%), SD | Total maximum    | P-Value |     |
|------------------------------------------------------------------------------------------------------|-----------------------|----------|---|---|---|---|------------------|------------------|---------|-----|
| <b>1. I think that I would like to use this program frequently</b>                                   |                       |          |   |   |   |   |                  |                  |         |     |
|                                                                                                      | CI <sup>c</sup> users | 17 (94)  | 0 | 0 | 2 | 4 | 11               | 60 (88.2, 0.72)  | 68      | .05 |
|                                                                                                      | Therapists            | 9 (90)   | 0 | 0 | 0 | 0 | 9                | 36 (100, 0.00)   | 36      |     |
| <b>2. I thought the program was easy to use</b>                                                      |                       |          |   |   |   |   |                  |                  |         |     |
|                                                                                                      | CI users              | 17 (94)  | 0 | 1 | 2 | 4 | 10               | 57 (83.8, 0.91)  | 68      | .06 |
|                                                                                                      | Therapists            | 9 (90)   | 0 | 0 | 0 | 2 | 7                | 34 (94.4, 0.44)  | 36      |     |
| <b>3. I found the various functions in this program were well integrated</b>                         |                       |          |   |   |   |   |                  |                  |         |     |
|                                                                                                      | CI users              | 18 (100) | 0 | 0 | 0 | 6 | 12               | 62 (86.1, 0.49)  | 72      | .28 |
|                                                                                                      | Therapists            | 9 (90)   | 0 | 0 | 1 | 5 | 3                | 29 (80.6, 0.71)  | 36      |     |
| <b>4. I would imagine that most people would learn to use this program very quickly</b>              |                       |          |   |   |   |   |                  |                  |         |     |
|                                                                                                      | CI users              | 18 (100) | 0 | 0 | 2 | 5 | 11               | 59 (81.9, 0.71)  | 72      | .04 |
|                                                                                                      | Therapists            | 9 (90)   | 0 | 0 | 0 | 5 | 4                | 31 (86.1, 0.53)  | 36      |     |
| <b>5. I felt very confident using the program</b>                                                    |                       |          |   |   |   |   |                  |                  |         |     |
|                                                                                                      | CI users              | 18 (100) | 0 | 2 | 2 | 5 | 9                | 53 (73.6, 1.04)  | 72      | .22 |
|                                                                                                      | Therapists            | 9 (90)   | 0 | 0 | 0 | 1 | 8                | 34 (94.4, 0.44)  | 36      |     |
| <b>6. I found the program unnecessarily complex</b>                                                  |                       |          |   |   |   |   |                  |                  |         |     |
|                                                                                                      | CI users              | 17 (94)  | 0 | 1 | 0 | 3 | 4                | 62 (91.2, 0.79)  | 68      | .77 |
|                                                                                                      | Therapists            | 9 (90)   | 0 | 0 | 1 | 3 | 13               | 32, (88.9, 0.73) | 36      |     |
| <b>7. I think that I would need the support of a technical person to be able to use this program</b> |                       |          |   |   |   |   |                  |                  |         |     |
|                                                                                                      | CI users              | 18 (100) | 3 | 2 | 1 | 3 | 9                | 49, (68.1, 1.60) | 72      | .65 |
|                                                                                                      | Therapists            | 9 (90)   | 0 | 0 | 0 | 1 | 8                | 35 (97.2, 0.33)  | 36      |     |
| <b>8. I thought there was too much inconsistency in this program</b>                                 |                       |          |   |   |   |   |                  |                  |         |     |
|                                                                                                      | CI users              | 18 (100) | 1 | 0 | 0 | 2 | 15               | 62 (86.1, 0.97)  | 72      | .71 |
|                                                                                                      | Therapists            | 9 (90)   | 0 | 1 | 0 | 1 | 7                | 32 (88.9, 1.01)  | 36      |     |

|                                                             |            |          |   |   |   |   |    |                  |    |     |
|-------------------------------------------------------------|------------|----------|---|---|---|---|----|------------------|----|-----|
| <b>9. I found the program very cumbersome to use</b>        |            |          |   |   |   |   |    |                  |    |     |
|                                                             | CI users   | 18 (100) | 1 | 0 | 0 | 2 | 18 | 62 (86.1, 0.97)  | 72 | .13 |
|                                                             | Therapists | 9 (90)   | 0 | 0 | 0 | 1 | 8  | 35, (97.2, 0.33) | 36 |     |
| <b>10. I needed to learn a lot before using the program</b> |            |          |   |   |   |   |    |                  |    |     |
|                                                             | CI users   | 18 (100) | 1 | 3 | 0 | 4 | 10 | 54 (75.0, 1.11)  | 72 | .02 |
|                                                             | Therapists | 9 (90)   | 0 | 0 | 0 | 0 | 9  | 36 (100, 0.00)   | 36 |     |

<sup>a</sup>For statements 1-5, scores range from 0 "I strongly disagree" to 4 "I strongly agree", whereas the scores are reversed for statements 6-10. In the original questionnaire the statements were ordered 1, 6, 2, 7, 3, 8, 4, 9, 5, 10. For ease of interpretation, we have reordered the statements in the table.

<sup>b</sup>Scores were compared based on the percentage of the total score to the maximum score possible.

<sup>c</sup>CI: cochlear implant.
