# Supplementary material for: Therapist-Guided Telerehabilitation for Adult Cochlear Implant Users: Developmental and Feasibility Study
Source: PubMed Central journal article supplement (PMC7290457; doi:10.2196/15843), 2020-05-28
Supplement: rehab_v7i1e15843_app5.pdf [file rehab_v7i1e15843_app5.pdf]

## Results for the Therapist Questionnaire (N=10)

| Please indicate how true each of the following statements is for you |                                                                                                              | n (%)    | Not true 0 | 1 | 2 | 3 | Very true 4 |
|----------------------------------------------------------------------|--------------------------------------------------------------------------------------------------------------|----------|------------|---|---|---|-------------|
| <b>Backend for therapists</b>                                        |                                                                                                              |          |            |   |   |   |             |
| <b>Initial analysis</b>                                              |                                                                                                              |          |            |   |   |   |             |
|                                                                      | 1. I can easily find my way around the section "My patients".                                                | 10 (100) | 0          | 0 | 0 | 0 | 10          |
|                                                                      | 2. I can easily create new accounts for my patients.                                                         | 10 (100) | 0          | 0 | 0 | 0 | 10          |
|                                                                      | 3. All elements of the initial analysis are covered.                                                         | 10 (100) | 0          | 0 | 1 | 1 | 8           |
| <b>Statistical features</b>                                          |                                                                                                              |          |            |   |   |   |             |
|                                                                      | 4. The statistics are understandable.                                                                        | 10 (100) | 0          | 0 | 2 | 6 | 2           |
|                                                                      | 5. The statistics are clearly represented.                                                                   | 10 (100) | 0          | 1 | 4 | 4 | 1           |
| <b>Training program</b>                                              |                                                                                                              |          |            |   |   |   |             |
| <b>Exercises</b>                                                     |                                                                                                              |          |            |   |   |   |             |
|                                                                      | 6. The exercises are relevant to cochlear implant users' daily lives.                                        | 10 (100) | 0          | 0 | 0 | 4 | 6           |
|                                                                      | 7. The exercises are relevant to the hearing rehabilitation process.                                         | 10 (100) | 0          | 0 | 0 | 0 | 10          |
|                                                                      | 8. The exercises cover the most important elements of auditory training.                                     | 10 (100) | 0          | 0 | 0 | 3 | 7           |
|                                                                      | 9. The exercises are clear.                                                                                  | 10 (100) | 0          | 0 | 0 | 1 | 9           |
|                                                                      | 10. The supporting tools meet the needs of cochlear implant users.                                           | 9 (90)   | 0          | 0 | 1 | 1 | 7           |
|                                                                      | 11. The concept of travelling through Europe is appealing.                                                   | 10 (100) | 0          | 0 | 0 | 3 | 7           |
| <b>Feedback</b>                                                      |                                                                                                              |          |            |   |   |   |             |
|                                                                      | 12. The feedback is appropriate for cochlear implant patients.                                               | 10 (100) | 0          | 0 | 0 | 1 | 9           |
|                                                                      | 13. With the given feedback, the patients can assess their performance realistically.                        | 9 (90)   | 0          | 0 | 0 | 3 | 6           |
|                                                                      | 14. The given feedback seems to be motivating for further training.                                          | 9 (90)   | 0          | 0 | 0 | 3 | 6           |
| <b>Adaptive features</b>                                             |                                                                                                              |          |            |   |   |   |             |
|                                                                      | 15. Adapting the level of difficulty throughout an exercise is reasonable from a therapist's point of view.  | 9 (90)   | 0          | 0 | 0 | 0 | 9           |
| <b>Statistical features</b>                                          |                                                                                                              |          |            |   |   |   |             |
|                                                                      | 16. The statistical analysis makes it easy for the patients to assess their training performance.            | 10 (100) | 0          | 0 | 1 | 2 | 7           |
|                                                                      | 17. From the patient's point of view, the statistics are clear and comprehensible.                           | 10 (100) | 0          | 0 | 3 | 4 | 3           |
| <b>Motivational features</b>                                         |                                                                                                              |          |            |   |   |   |             |
|                                                                      | 18. The statistical analysis makes it easy for the patients to assess their training performance.            | 10 (100) | 0          | 0 | 1 | 2 | 7           |
|                                                                      | 19. The features of the program (training agenda, time information) motivate patients to practice regularly. | 10 (100) | 0          | 0 | 1 | 6 | 3           |

|                           |               |                                                                                                     |             |   |   |   |   |    |
|---------------------------|---------------|-----------------------------------------------------------------------------------------------------|-------------|---|---|---|---|----|
|                           | <b>Design</b> |                                                                                                     |             |   |   |   |   |    |
|                           |               | 20. The digital training program is visually appealing.                                             | 9<br>(90)   | 0 | 0 | 0 | 2 | 7  |
|                           |               | 21. The font size is appropriate.                                                                   | 10<br>(100) | 0 | 0 | 0 | 0 | 10 |
| <b>Overall assessment</b> |               |                                                                                                     |             |   |   |   |   |    |
|                           |               | 22. The program met my expectations.                                                                | 9<br>(90)   | 0 | 2 | 0 | 3 | 4  |
|                           |               | 23. I could imagine integrating the program in my therapeutic routine.                              | 9<br>(90)   | 0 | 0 | 1 | 8 | 0  |
|                           |               | 24. I would recommend this program to my patients.                                                  | 10<br>(100) | 0 | 0 | 0 | 0 | 10 |
|                           |               | 25. Patients would be as satisfied with this type of therapy as they are with face-to-face therapy. | 9<br>(90)   | 0 | 5 | 1 | 3 | 0  |
|                           |               | 26. Digital training could add to regular auditory training.                                        | 10<br>(100) | 1 | 0 | 0 | 0 | 9  |
|                           |               | 27. Digital training could replace regular auditory training.                                       | 10<br>(100) | 4 | 4 | 2 | 0 | 0  |
|                           |               | 28. Family members would likely support the patients during the digital training.                   | 10<br>(100) | 1 | 1 | 1 | 3 | 4  |
|                           |               | 29. The program is scientifically sound.                                                            | 10<br>(100) | 0 | 0 | 0 | 2 | 8  |
